# Supplementary material for: PUF-8 negatively regulates RAS/MAPK signalling to promote differentiation of C. elegans germ cells
Source: PubMed Central journal article supplement — Development. 2013 Apr 15;140(8):1645–54. doi: 10.1242/dev.088013 (PMC3621483; doi:10.1242/dev.088013), 2013-04-15
Supplement: supp_140.8.1645_DEV088013.pdf [file supp_140.8.1645_DEV088013.pdf]

**EMS***puf-8 (zh17) unc-4(e120)**mnC1*

Clone wild-type F1, collect embryos

*puf-8 (zh17) unc-4(e120)*  $\frac{m}{+}$ *mnC1*

Screen for plates in which about 25% of the uncoordinated F2 worms are sterile

*puf-8 (zh17) unc-4(e120)*  $\frac{m}{m}$   
*mnC1**puf-8 (zh17) unc-4(e120)*  $\frac{m}{m}$   
*puf-8 (zh17) unc-4(e120)*  $\frac{m}{m}$ 

Clone wild-type F2s and select for the one whose uncoordinated progeny are all sterile

**Fig. S1. The genetic screen.** In total, 10,639 F1 worms, corresponding to 21,278 haploid genomes, were screened and 71 mutants, designated with allele numbers *kp-1* through *kp-71*, were isolated. Based on the germline phenotype, the mutants were broadly classified into three classes: class I, reduced germline; class II, tumourous germline; and class III, masculinized germline (mog) (see Fig. 1 and Table S1). So far, 37 of these alleles have been tested through complementation analysis; these 37 have been assigned to 29 different complementation groups. This screen also yielded new alleles of already known synthetic mutants of *puf-8*. The Hansen laboratory (University of Calgary, Canada) has isolated an allele of *puf-8* as an enhancer of the tumour phenotype observed in weak gain-of-function alleles of *glp-1* (Racher and Hansen, 2012). Both *glp-1* and three of our class II alleles, *kp16*, *kp31* and *kp43*, are on chromosome III. Therefore, we tested whether these three alleles map to *glp-1* by complementation. All three alleles failed to complement *ar202*, a known allele of *glp-1*, confirming that these three are indeed new alleles of *glp-1*. Mutations in *fbf-1* and *lip-1* have been shown to display synthetic phenotype with *puf-8(-)* (Bachorik and Kimble, 2005; Morgan et al., 2010). Complementation analysis confirmed that *kp8* and *kp12* are alleles of *fbf-1* and *lip-1*, respectively.

**A**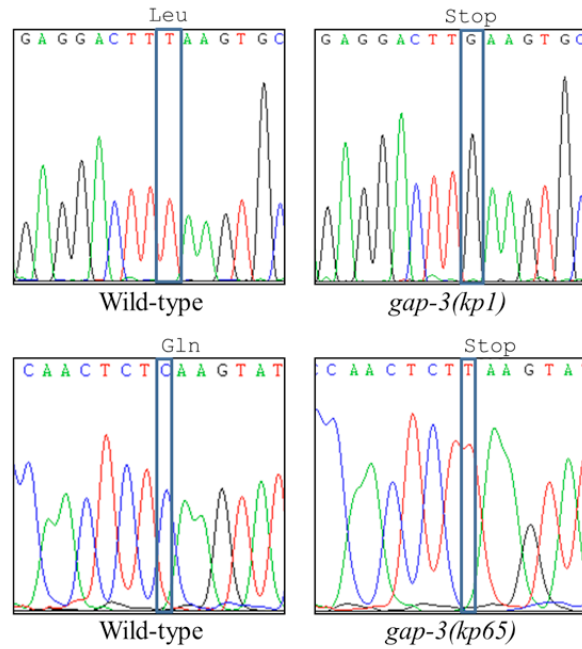**B**

MHSENTTPNSSTEGPLFLKHTHTNPPTPDISPNDVWYHGELNEHDANHLLQGTSPGAFVLRQTGQTRFYLSILDQ  
 DGYPKHLPIRQLTPPHYFFEGKRFETLRDIVDAYQLAVI PVRKGGIMPINGEIQETKYLCVRRFEQREIDEMNSE  
 IGDILSVCEETDETGWMLGRNETSGSVGIILRSHLEPLITEVADLSDLPYFYDVTSTDMVQYSPIGTFLRRSSKG  
 TDYALLVKTQFDLVEKFLIVGCP SRGFSLAGRPFPPTIGHVLTRYCDRAISGGVRLTHAVCVKHQRKSSRRSTA  
 EVRWPPFIGNETASMSSQYDDGLREQKPRRMFRGTSIDTALASSSFLTSTAMPSPSTTVSTGIPEHLIDRFH  
 DEDVNNHPETSSTTTVAATVALRKSREEKQWKECWLTLSDIPGGSSQLSVFDSMGSKLRQQVDLSTCTLFWLDE  
 SVFCADGCLFLSPSPFPQQPPTLYLCFRPYTAFLKWIRILRSRTIYQDVPPPMLQGTISVGEFNSQVSILSIEID  
Q *kp65* \*

KFRSELLKSDMFYSAQVSLNGVKIGVSNAPAGNKGPNEMPVVVIDSKFVIPCIPTCSTNIQLSMNSHSSIGKR  
 GRPCGVTVTICLNENNESICQSQADSTGFVFRQNRCPVLPDRYKPLLDMIRECPSSILSWPSQVLP SHLKQF  
 MYTCISHLYALNPQFMSQVIRRIINDILVTSTAEDVFRKDSLATGIITQCLRHLEFKTPFDEFLENAQFSQSLKQ  
 QNLDSGGGAVELLVNFVDORLLTIPLATRLLTAAECAGCRFGDEQHEOHLIKRT T SALLILRVLNPIIFSTLNT  
T *kp1* \*

GIGSQIAKLVOISANSAASQTPPTDSLTPAASTIRRMFDRIIFLVNQQAESPEDSEIGEVTWISCLTYMIGH  
SLTIRSATSSSEDVHLPLPVLELIRLHHL\*

**Fig. S2. Mutations in *kp1* and *kp65* alleles disrupt the GTPase-activating domain (GAP) of GAP-3. (A)** Electropherograms showing the wild-type and mutant sequences around the mutated nucleotide. **(B)** Amino acid sequence of GAP-3. The amino acids changed into STOP (\*) codons is highlighted in red. The GAP domain sequence is underlined.

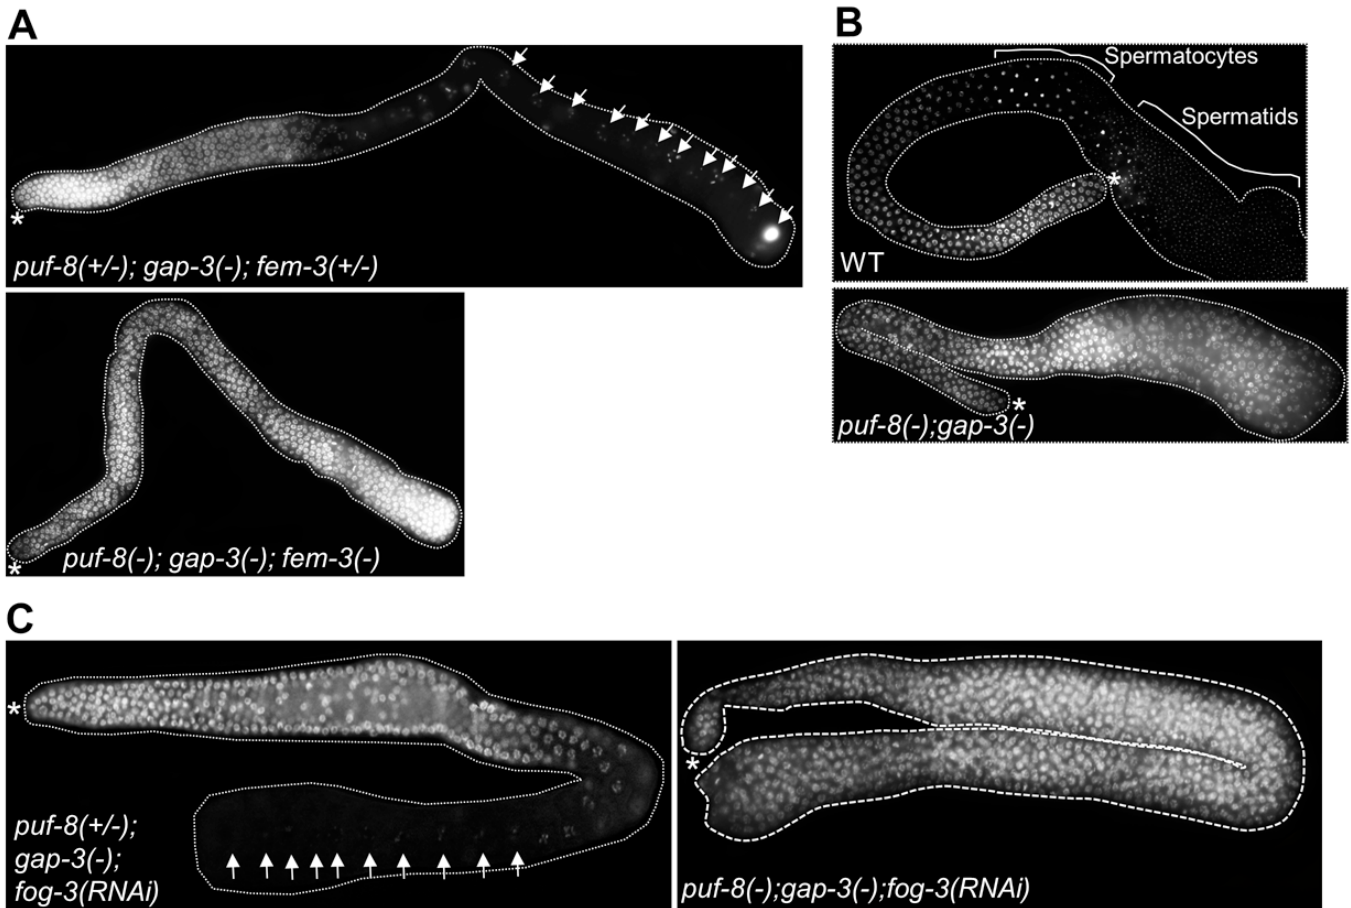

**Fig. S3. Overproliferation phenotype of *puf-8(-); gap-3(-)* is not dependent on germ cell sex.** (A-C) Dissected DAPI-stained gonads of the indicated genotypes are shown. Although the gonads in A and C are from hermaphrodite animals, the ones in B are from males. Arrows in A,C indicate oocyte nuclei. In this, as well as in Fig. S4, the distal part of the gonad is oriented towards the left; the distal end is indicated by an asterisk. Although gametes are present in the feminized [*fem-3(-)* and *fog-3(-)*] hermaphrodites and males heterozygous for *puf-8* [*puf-8(+/-)*], they are completely absent in the *puf-8(-/-)* homozygotes; instead, the proximal region of the *puf-8(-/-)* homozygous gonads are filled with mitotically proliferating cells. Hermaphrodites carrying loss-of-function in *fem-3* or *fog-3* fail to produce sperm, and make only oocytes. Hence these mutants are said to ‘feminize’ the hermaphrodite germline (Ahringer and Kimble, 1991; Chen et al., 2000).

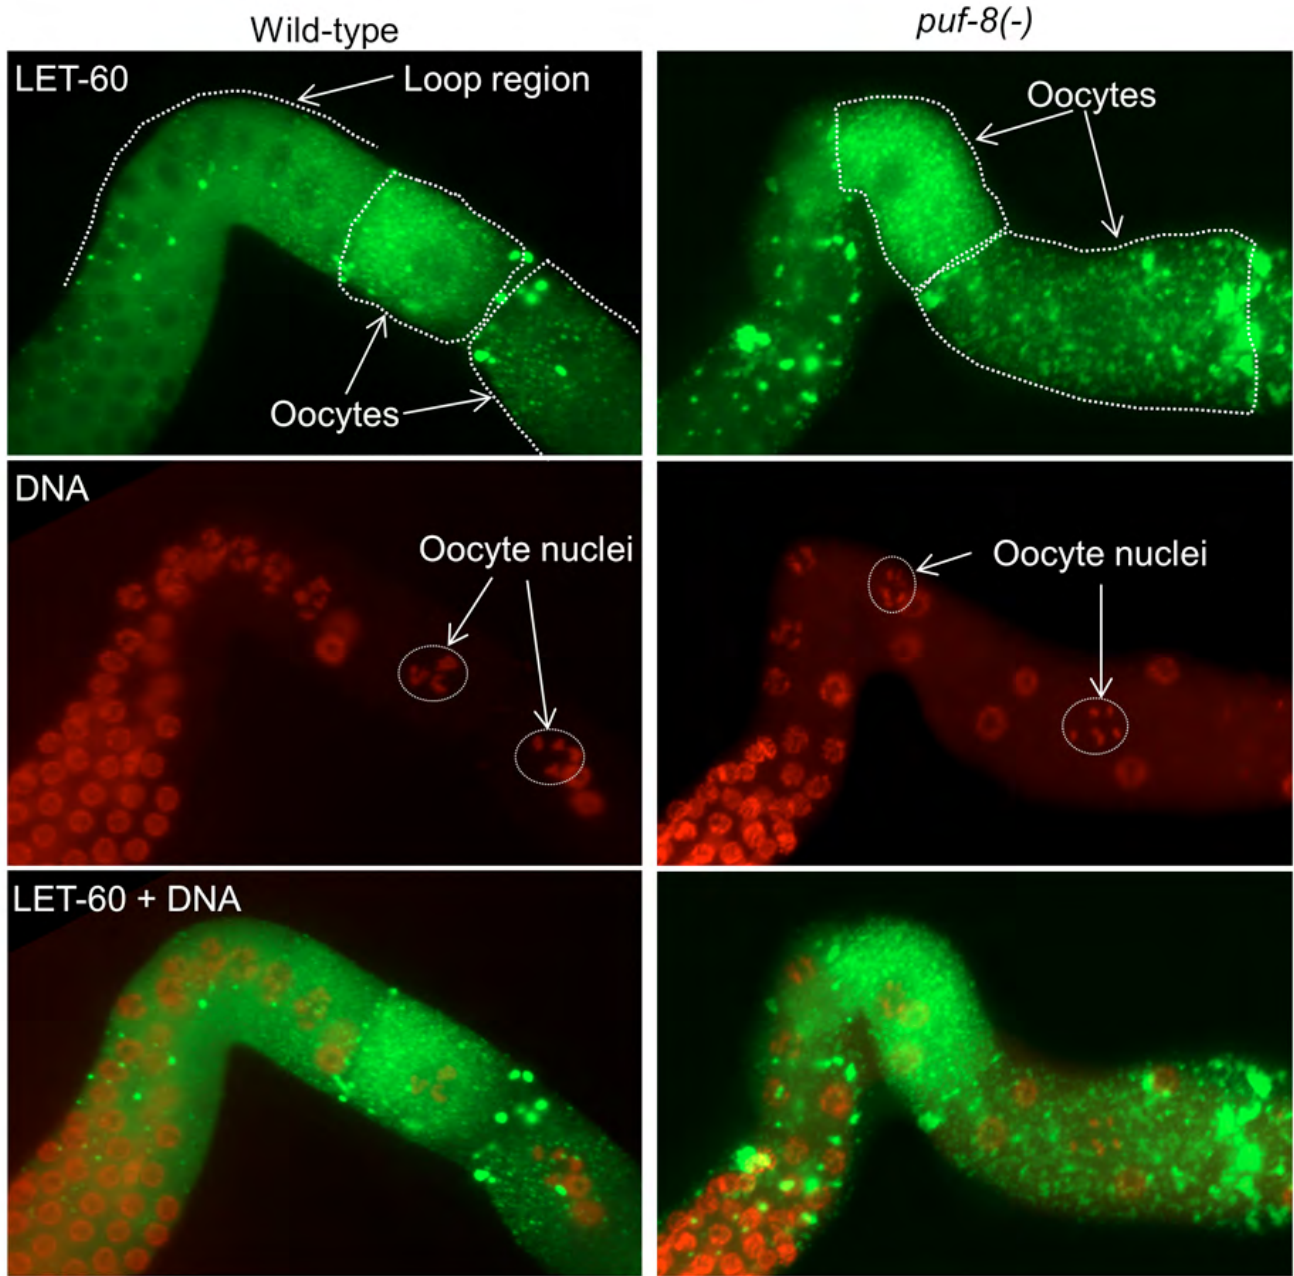

**Fig. S4. Expression pattern of LET-60 in the wild-type and *puf-8(-)* gonads.** Dissected gonads stained with anti-LET-60 antibodies and DAPI. Only the loop region and the first couple of oocytes are shown. Although the LET-60 level in the oocytes is approximately the same in the wild-type and *puf-8(-)*, the punctate structures stained by the anti-LET-60 antibodies are larger and more numerous in the loop region of *puf-8(-)* gonad when compared with the wild type. See Fig.7 for the LET-60 expression pattern in the distal part of the gonad. Owing to strong LET-60 signals in the region shown above, the duration of exposure for the acquisition of LET-60 images shown here was about one-third of that in the images in Fig. 7.



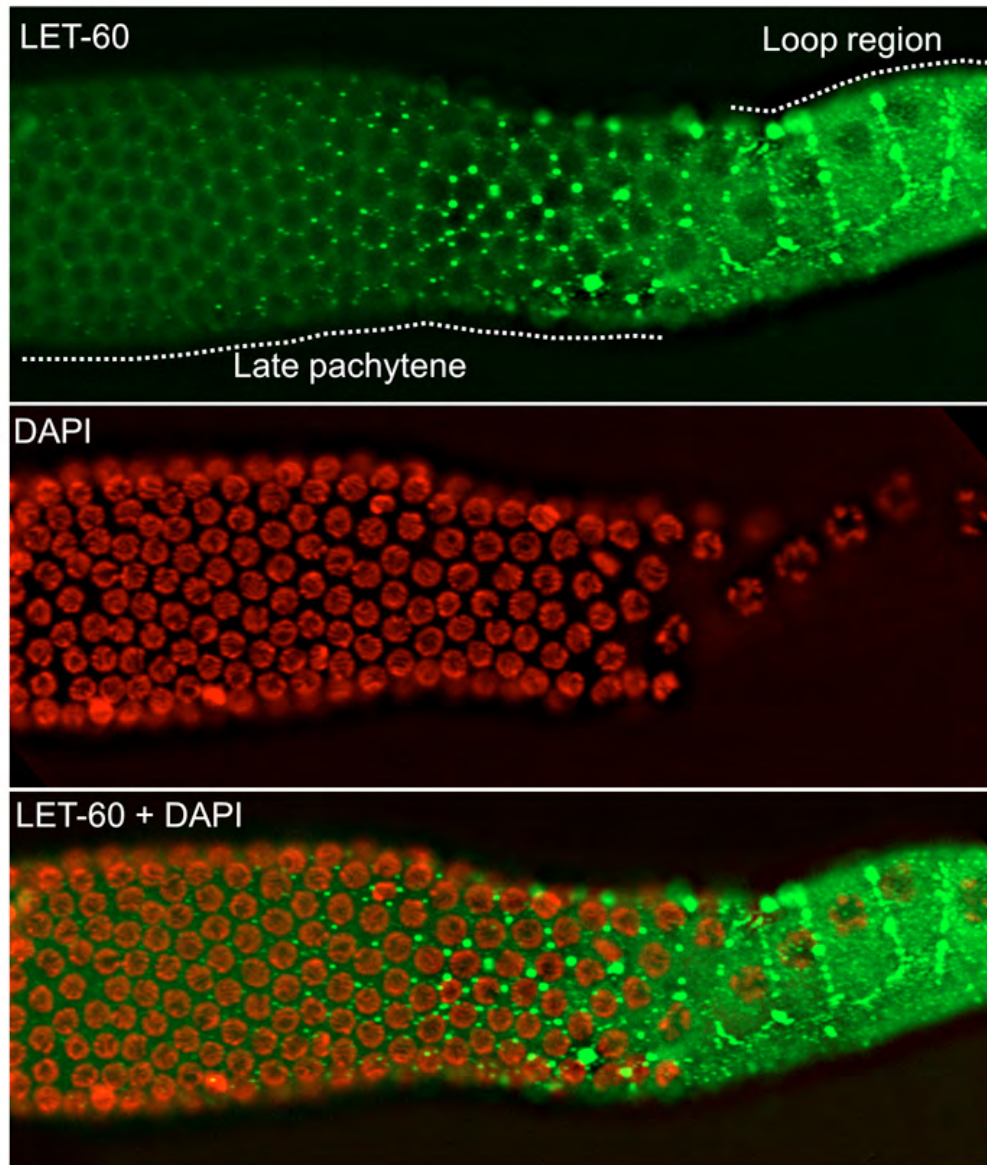

**Fig. S5. Expression pattern of LET-60 in the pachytene region of wild-type gonads.** Dissected gonad stained with anti-LET-60 antibodies and DAPI. Only the proximal half of the distal gonad is shown. Although the LET-60 signal is fainter in the distal (left) part of the late pachytene region, distinct puncta at the corners of the hexagonal germ cells are noticeable in most cells of the late pachytene region. Membrane localization of LET-60 is more readily observable in the rectangular immature oocytes at the loop region.

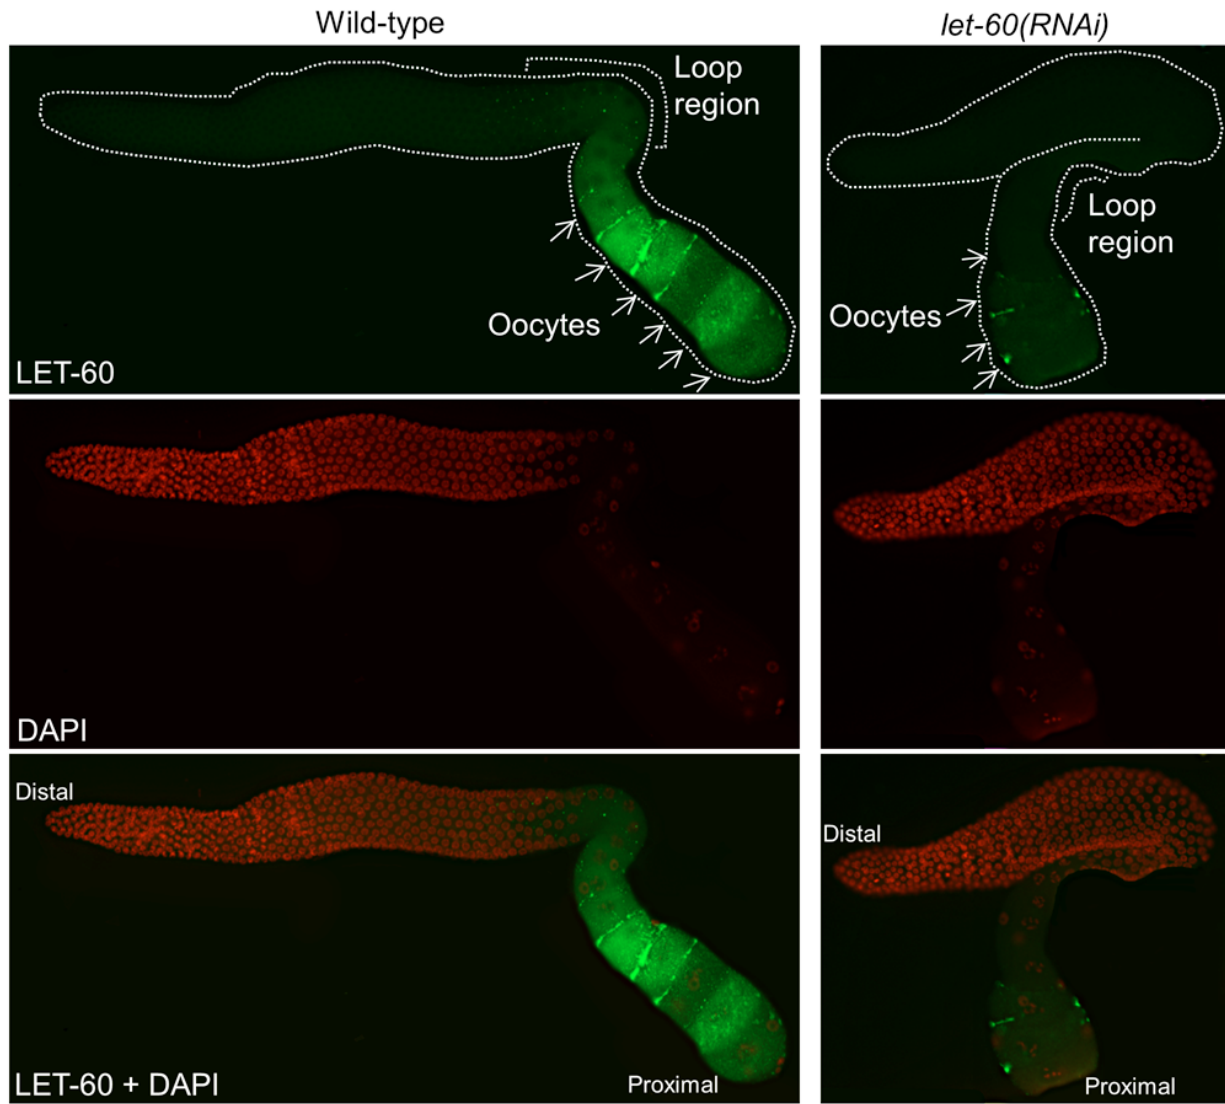

**Fig. S6. Anti-LET-60 antibody specifically recognizes LET-60.** Dissected gonads stained with anti-LET-60 antibodies and DAPI. Although LET-60 expression in the loop region and oocytes are readily visible in the wild-type gonad, LET-60 is undetectable in the loop region of *let-60(RNAi)* gonad; even in the oocytes, only a weak signal is visible in parts of the cell membrane.

**Table S1. Classification of mutants that show synthetic sterility with *puf-8(-)***

| <b>Class</b> | <b>Germline defect</b>            | <b>Number of mutants*</b> | <b>Penetrance</b> |
|--------------|-----------------------------------|---------------------------|-------------------|
| I            | Reduced germline                  | 20 (16)                   | ~100%             |
| II           | Tumorous germline                 | 7 (3)                     | 20-100%           |
| III          | Mog (masculinization of germline) | 10 (10)                   | 15-100%           |

\*Numbers in parentheses are the number of complementation groups for each class.

**Table S2. *C. elegans* strains used in this study**

| <b>3'UTR fusions</b> |                                                                                                                         |                                           |                                 |
|----------------------|-------------------------------------------------------------------------------------------------------------------------|-------------------------------------------|---------------------------------|
| <b>Strain</b>        | <b>Transgene</b>                                                                                                        | <b>Genotype</b>                           | <b>Reference</b>                |
| IT285                | <i>pie-1 prom:gfp:H2B:let-60 3'utr</i>                                                                                  | <i>unc-119(ed3) III; kpls(pSV6)</i>       | This study                      |
| IT734                | <i>pie-1 prom:gfp:H2B:let-60 3'utr</i>                                                                                  | <i>puf-8(ok302) unc-4(e120) / mnC1 II</i> | This study                      |
| IT460                | <i>pie-1 prom:gfp:H2B:let-60 (SubC) 3'utr</i>                                                                           | <i>unc-119(ed3) III; kpls(pSV25)</i>      | This study                      |
| <b>ORF fusions</b>   |                                                                                                                         |                                           |                                 |
| IT543                | <i>pie-1 prom:gfp:gap-3 ORF:hip-1 3'utr</i>                                                                             | <i>unc-119(ed3) III; kpls(pSV39)</i>      | This study                      |
| IT654                | <i>pie-1 prom:gfp:gap-3 ORF:hip-1 3'utr</i>                                                                             | <i>dpy-5(e61) gap-3(kp-1) I</i>           | This study                      |
| IT722                | <i>puf-8 prom:puf-8 ORF:9xHA:gfp:puf-8 3'utr</i>                                                                        | <i>unc-119(ed3) III; kpls(pAK9)</i>       | This study                      |
| <b>Other strains</b> |                                                                                                                         |                                           |                                 |
| <b>Strain</b>        | <b>Genotype</b>                                                                                                         |                                           | <b>Reference</b>                |
| IT60                 | <i>puf-8(zh17) unc-4(e120) / mnC1 II</i>                                                                                |                                           | (Ariz et al., 2009)             |
| JH1500               | <i>puf-8(ok302) unc-4(e120) / mnC1 II</i>                                                                               |                                           | (Subramaniam and Seydoux, 2003) |
| IT540                | <i>gap-3(kp1) I; puf-8(zh17) unc-4(e120) / mnC1 II</i>                                                                  |                                           | This study                      |
| IT770                | <i>gap-3(kp65) I; puf-8(zh17) unc-4(e120) / mnC1 II</i>                                                                 |                                           | This study                      |
| IT124                | <i>fbf-1(ok91) fbf-2(q704) puf-8(zh17) unc-4(e120)/mIn1[mIs14 dpy-10(e128)] II.</i>                                     |                                           | This study                      |
| IT136                | <i>fbf-1(ok91) fbf-2(q704) unc-4(e120)/mIn1[mIs14 dpy-10(e128)] II.</i>                                                 |                                           | This study                      |
| IT190                | <i>dpy-5(e61)5 gap-3(kp-1) I; fbf-1(ok91) fbf-2(q704) unc-4(e120)/mIn1[mIs14 dpy-10(e128)] II.</i>                      |                                           | This study                      |
| IT191                | <i>dpy-5(e61) gap-3(kp-1) I; fbf-1(ok91) fbf-2(q704) puf-8(zh17) unc-4(e120)/mIn1[mIs14 dpy-10(e128)] II</i>            |                                           | This study                      |
| BA606                | <i>spe-6(hc49) unc-25(e156)III; eDp6(III;f)</i>                                                                         |                                           | (Varkey et al., 1993)           |
| IT208                | <i>dpy-5(e61) gap-3(kp-1)/hT2[dpy-18(h662)] I ; puf-8(zh17)unc-4(e120)/mnc1 II ; +/hT2; +/hT2[bli-4(e937)] III</i>      |                                           | This Study                      |
| IT769                | <i>gap-3(kp-1)/hT2[dpy-18(h662)] I ; puf-8(zh17)unc-4(e120)/mnc1 II ; spe-6(hc49) unc-25(e156)/hT2[bli-4(e937)] III</i> |                                           | This study                      |



**Table S3. Sequences of PCR primers used in this study: primers for generating GFP:GAP-3 fusion**

| <b>Primer name</b> | <b>Sequence</b>                      | <b>Description</b>                                                                                  |
|--------------------|--------------------------------------|-----------------------------------------------------------------------------------------------------|
| KS33575            | tctggatccactagtagtgcactcaagcgagaatac | Forward primer for upstream CDS fragment of <i>gap-3</i>                                            |
| KS3102             | cacagccagctgatagcctc                 | Reverse primer for upstream CDS fragment of <i>gap-3</i> from genomic DNA (to include first intron) |
| KS3576             | tctggcgcccaaatgatgaagccgaatgagc      | Reverse primer for downstream CDS fragment of <i>gap-3</i> from cDNA                                |
| KS2092             | ttcctcaacaacagccgccg                 | To check orientation of <i>gap-3</i> cDNA fragment in pSV37                                         |

**Table S4. List of the genes screened by RNAi for rescue of the germline tumour phenotype of *puf-8(-); gap-3(-)***

| Sequence   | Gene name             | Functional description*                                                                                                                                                                                             |
|------------|-----------------------|---------------------------------------------------------------------------------------------------------------------------------------------------------------------------------------------------------------------|
| ZK1067.1   | <b><i>let-23</i></b>  | Encodes an EGF-receptor-family transmembrane tyrosine kinase                                                                                                                                                        |
| ZK792.6    | <b><i>let-60</i></b>  | Encodes a member of the GTP-binding RAS protooncogene family                                                                                                                                                        |
| C05D11.4   | <b><i>let-756</i></b> | Encodes fibroblast growth factor (FGF)-like ligand required for progression through early larval development                                                                                                        |
| F36H1.4    | <b><i>lin-3</i></b>   | Encodes a member of the EGF family of peptide growth factors                                                                                                                                                        |
| F43C1.2    | <b><i>mpk-1</i></b>   | Encodes a mitogen-activated protein (MAP) kinase an ERK ortholog                                                                                                                                                    |
| F26E4.1    | <b><i>sur-6</i></b>   | Encodes a regulatory (B) subunit of serine/threonine protein phosphatase 2A (PP2A-B)                                                                                                                                |
| F52C12.5   | <b><i>elt-6</i></b>   | Erythroid-Like Transcription factor family                                                                                                                                                                          |
| F55A8.1    | <b><i>egl-18</i></b>  | Encodes a member of the GATA-family of transcription factors                                                                                                                                                        |
| C08C3.1    | <b><i>egl-5</i></b>   | Encodes a homeodomain transcription factor, orthologous to Drosophila Abd-B and the vertebrate Hox9-13 proteins                                                                                                     |
| Y54G11A.10 | <b><i>lin-7</i></b>   | Encodes a protein that contains a PDZ domain and an L27 domain, two protein interaction domains that likely serve as organizational centers for large macromolecular complexes in polarized cells                   |
| F39B2.4    | <b><i>sur-2</i></b>   | Encodes a novel protein that is orthologous to the Drosophila and human MED23 mediator subunits                                                                                                                     |
| F26F4.3    | <b><i>rom-1</i></b>   | Rhomboid (drosophila) related                                                                                                                                                                                       |
| C48A7.1    | <b><i>egl-19</i></b>  | Encodes the pore-forming alpha1 subunit of a voltage-gated calcium channel orthologous to the alpha subunit of mammalian l-type calcium ion channels                                                                |
| M110.5     | <b><i>dab-1</i></b>   | Encodes an ortholog of the cytoplasmic adaptor protein DISABLED, required for normal molting and meiotic arrest;                                                                                                    |
| F38H4.9    | <b><i>let-92</i></b>  | Encodes a homolog of PP2AC, the catalytic subunit of protein phosphatase 2A (PP2A)                                                                                                                                  |
| AC7.2      | <b><i>soc-2</i></b>   | Encodes a leucine-rich repeat protein; soc-2 functions downstream in the let-60/Ras and egl-15/FGF receptor signaling pathways to positively and negatively regulate signaling through these pathways, respectively |
| C09H6.2    | <b><i>lin-10</i></b>  | Encodes a PDZ and PTB domain-containing protein that is homologous to mammalian Munc interacting proteins (Mint1, OMIM:602414) and is required for polarized protein localization                                   |
| M01D7.7    | <b><i>egl-30</i></b>  | Encodes an ortholog of the heterotrimeric G protein alpha subunit Gq (Gq/G11 class)                                                                                                                                 |
| R01H10.8   | <b><i>cnk-1</i></b>   | Encodes a protein that contains a SAM domain, a PDZ domain, and a PH domain.                                                                                                                                        |
| C07H6.7    | <b><i>lin-39</i></b>  | Encodes a homeodomain protein homologous to the Deformed and Sex combs reduced family of homeodomain proteins                                                                                                       |

\*www.wormbase.org

Core components of RAS/MAPK signaling are shown in bold, and the rest are positive regulators of RAS/MAPK signaling.





|                                                            |                                                                         |                                                                                                      |
|------------------------------------------------------------|-------------------------------------------------------------------------|------------------------------------------------------------------------------------------------------|
| KS3441                                                     | taaaatgtaggaatagag                                                      | Common reverse primer for synthesizing template for in vitro transcription of substituted Fragment 4 |
| <b>Primers for PUF-8:9×HA:GFP transgene construct pAK9</b> |                                                                         |                                                                                                      |
| KS3788                                                     | tctactagtaccatacagacgtcccagactacgcctatccgtatgatgttccgga<br>ttatgct      | Forward primer amplify HA sequence for pAK8                                                          |
| KS3789                                                     | tctactagtcccggggcgtagtctgggacgtcgatgggtaagcataatccgg<br>aacatcatacggata | Reverse primer for HA sequence for pAK8                                                              |
| KS3791                                                     | tctcccgggtaccatacagacgtcccagactacgcctatccgtatgatgttccgg<br>attatgct     | Forward primer for HA sequence for pAK10                                                             |
| KS3792                                                     | tctcccggggcgcgcgcgtagtctgggacgtcgatgggtaagcataatccg<br>gaacatcatacggata | Reverse primer for HA sequence for pAK10                                                             |
| KS3794                                                     | tctgcgcgctaccatacagacgtcccagactacgcctatccgtatgatgttccgg<br>attatgct     | Forward primer for HA sequence for pAK11                                                             |
| KS3795                                                     | tctgcgcgcagcgtagtctgggacgtcgatgggtaagcataatccggaacatc<br>atacggata      | Reverse primer for HA sequence for pAK11                                                             |
| <b>Primers for reverse transcription and RT-PCR</b>        |                                                                         |                                                                                                      |
| KS2096                                                     | gcattagcggccgcgaaattaatacactcactatagggaga(t)21 v                        | Anchored oligo dT primer                                                                             |
| KS3297                                                     | gcatccgaacccctcctcg                                                     | Forward for <i>let-60</i> mRNA                                                                       |
| KS3299                                                     | aacggaacgaccggcagatgc                                                   | Reverse for <i>let-60</i> mRNA                                                                       |
| KS1102                                                     | tctaagcttatggctcaacaaagccgat                                            | Forward for <i>pie-1</i> mRNA                                                                        |
| KS2495                                                     | aatctgacgacgattcgcg                                                     | Reverse for <i>pie-1</i> mRNA                                                                        |
